# Supplementary material for: Distinguishing Sanghuangporus from sanghuang-related fungi: a comparative and phylogenetic analysis based on mitogenomes
Source: Springer Nature journal article supplement (doi:10.1007/s00253-024-13207-1), 2024-07-22
Supplement: MOESM1 [file 253_2024_13207_MOESM1_ESM.pdf]

# **Distinguishing *Sanghuangporus* from Sanghuang-related Fungi: A Comparative and Phylogenetic Analysis based on Mitogenomes**

**Xi-long Feng <sup>a</sup>, Tian-chen Xie <sup>a</sup>, Zhen-xin Wang <sup>a</sup>, Chao Lin <sup>a</sup>, Zhao-chen Li <sup>a</sup>, Jinxi Huo <sup>b</sup>,  
Yougui Li <sup>b</sup>, Chengwei Liu <sup>c</sup>, Jinming Gao <sup>a</sup>, Jianzhao Qi <sup>a,\*</sup>**

<sup>a</sup> Shaanxi Key Laboratory of Natural Products & Chemical Biology, College of Chemistry & Pharmacy, Northwest A&F University, Yangling, Xianyang 712100, China

<sup>b</sup> Sericultural Research Institute, Zhejiang Academy of Agricultural Sciences, Hangzhou 310021, People's Republic of China

<sup>c</sup> Key Laboratory for Enzyme and Enzyme-like Material Engineering of Heilongjiang, College of Life Science, Northeast Forestry University, Harbin 150040, China

Corresponding author: Jianzhao Qi, [qjz@nwafu.edu.cn](mailto:qjz@nwafu.edu.cn), ORCID: 0000-0003-1418-873X

## Content

|                                                                                                                                              |    |
|----------------------------------------------------------------------------------------------------------------------------------------------|----|
| Figure S1. Predicted secondary cloverleaf structures for tRNAs of <i>Inonotus hispidus</i> . ....                                            | 1  |
| Figure S2. Predicted secondary cloverleaf structures for tRNAs of <i>Porodaedalea chrysoloma</i> . ....                                      | 2  |
| Figure S3. Predicted secondary cloverleaf structures for tRNAs of <i>Phellinus ferrugineofuscus</i> .....                                    | 3  |
| Figure S4. Predicted secondary cloverleaf structures for tRNAs of <i>Phellinus gilvus</i> .....                                              | 4  |
| Figure S5. Predicted secondary cloverleaf structures for tRNAs of <i>Porodaedalea niemelaei</i> . ....                                       | 5  |
| Figure S6. Predicted secondary cloverleaf structures for tRNAs of <i>Phellinus viticola</i> . ....                                           | 6  |
| Figure S7. Mitochondrial relative composition of all Sanghuang-related fungi and circular maps of the other 10 Sanghuang-related fungi. .... | 7  |
| Figure S8. Heterogeneous sequence differentiation of mitochondrial genome based on the four data sets. ....                                  | 8  |
| Figure S9. Base substitution saturation analysis based on the four datasets, conducted by DAMBE <sup>3</sup> .....                           | 9  |
| Reference .....                                                                                                                              | 10 |

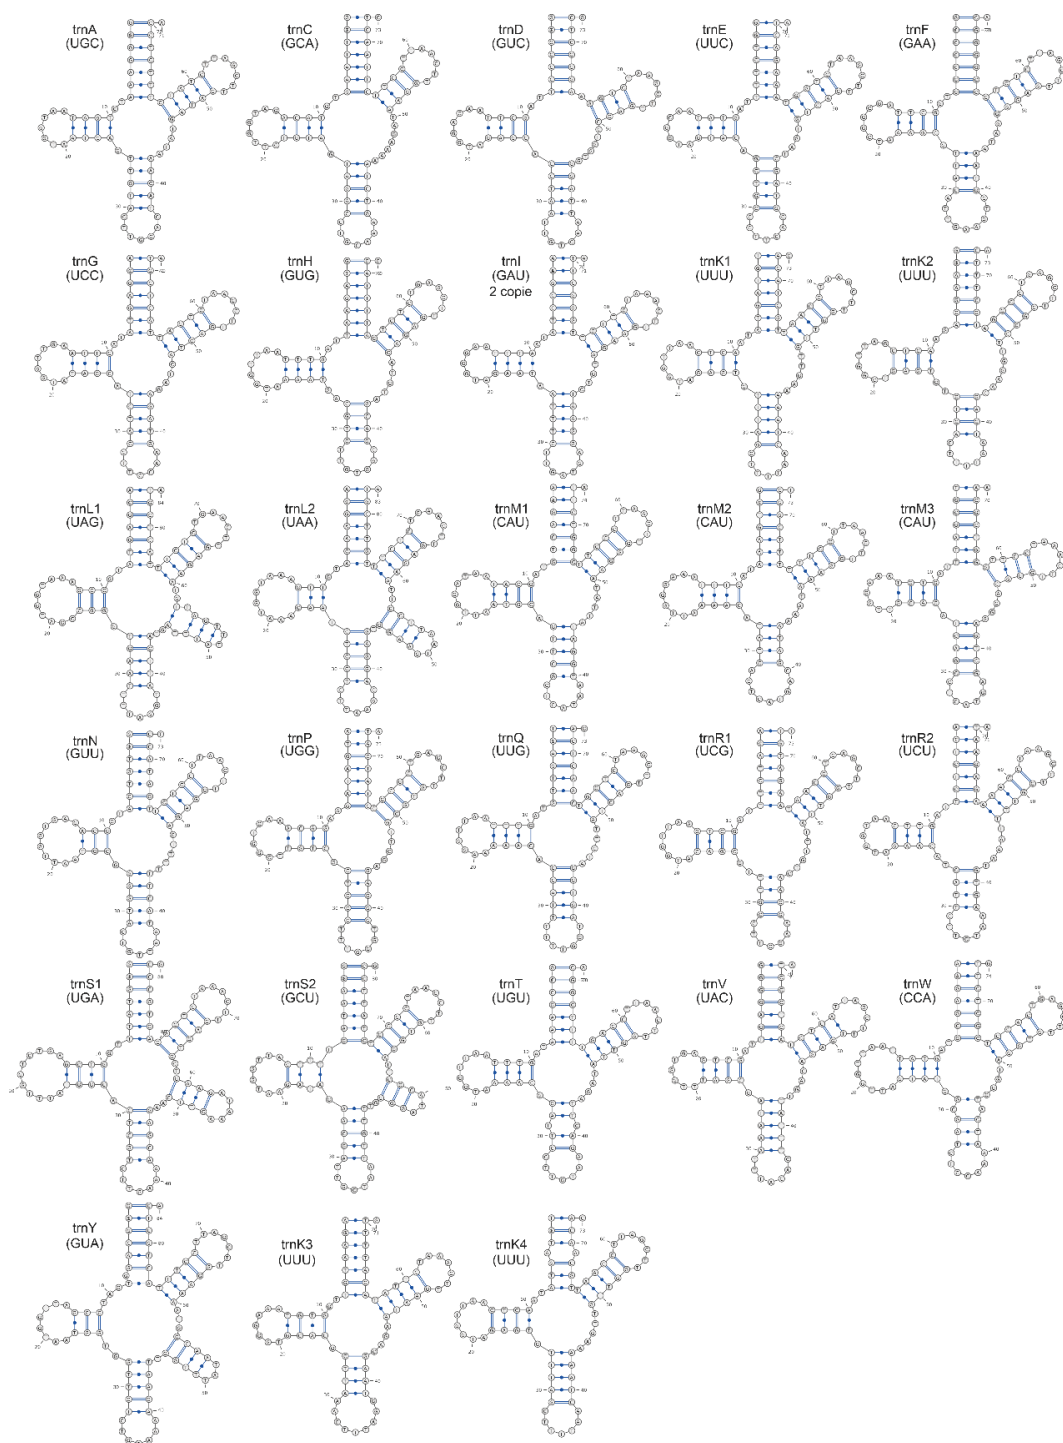

**Figure S1. Predicted secondary cloverleaf structures for tRNAs of *Inonotus hispidus*.**

(A) Isoleucine, (B) Glutamine, (C) Methionine, (D) Tryptophan, (E) Cysteine, (F) Tyrosine, (G, U) Leucine, (H) Lysine, (I) Aspartic, (J) Glycine, (K) Alanine, (L) Arginine, (M) Asparagine, (N, T) Serine, (O) Glutamic, (P) Phenylalanine, (Q) Histidine, (R) Threonine, (S) Proline, (V) Valine. The image was predicted by tRNAscan-SE 2.0.9(Chan and Lowe 2019) (<http://lowelab.ucsc.edu/tRNAscan-SE>), drawing with VARNA (<http://varna.lri.fr/>).

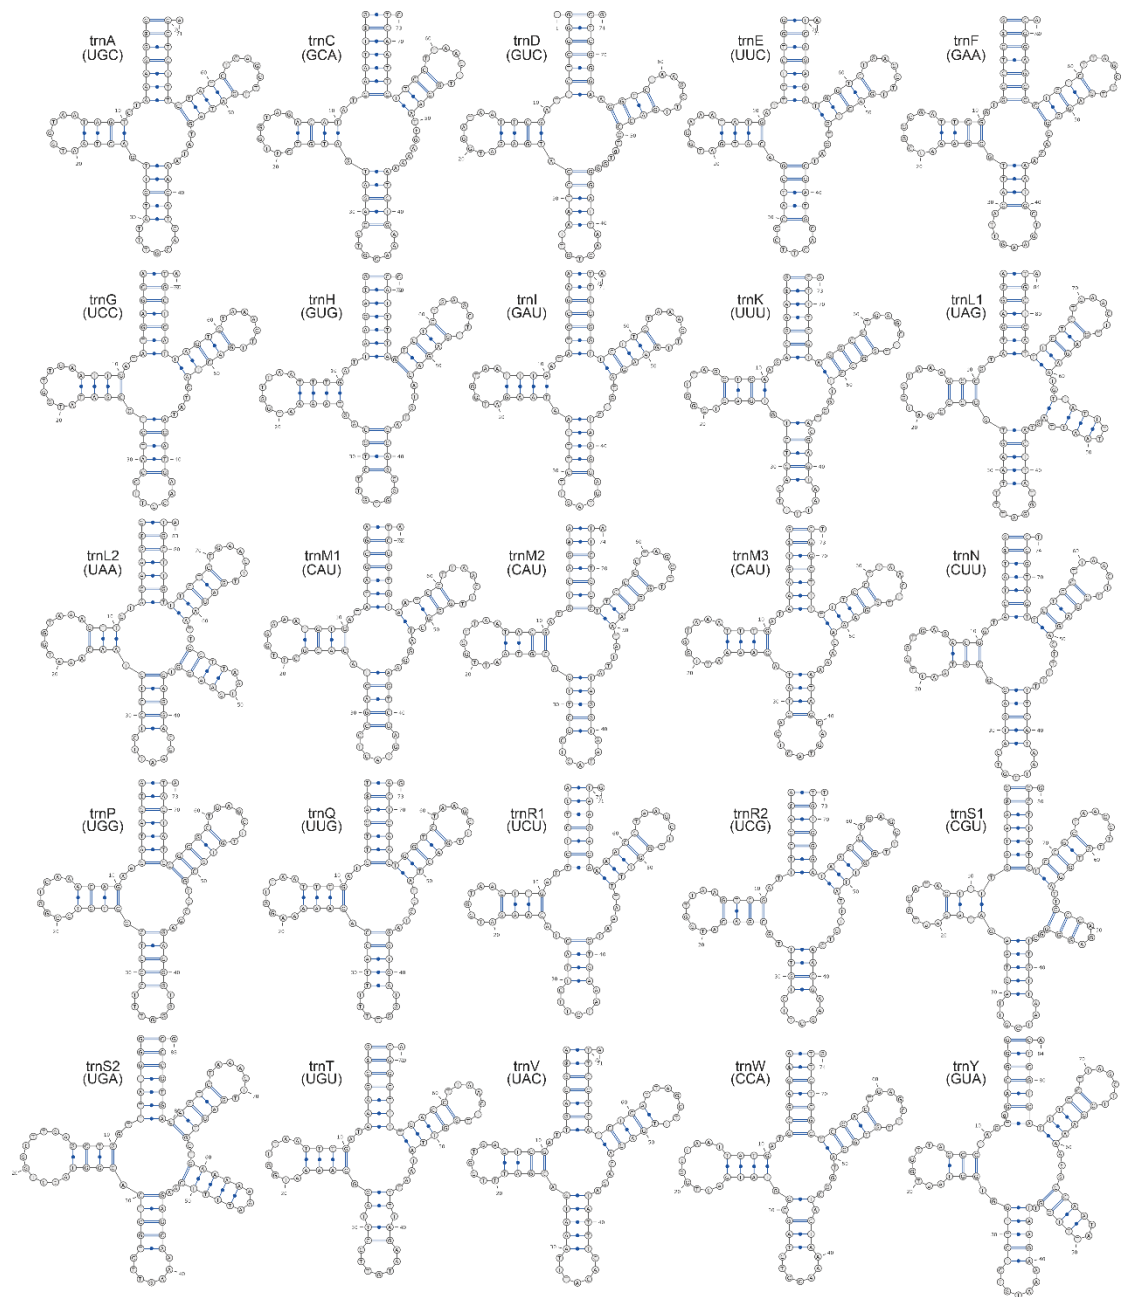

**Figure S2. Predicted secondary cloverleaf structures for tRNAs of *Porodaedalea chrysoloma*.**

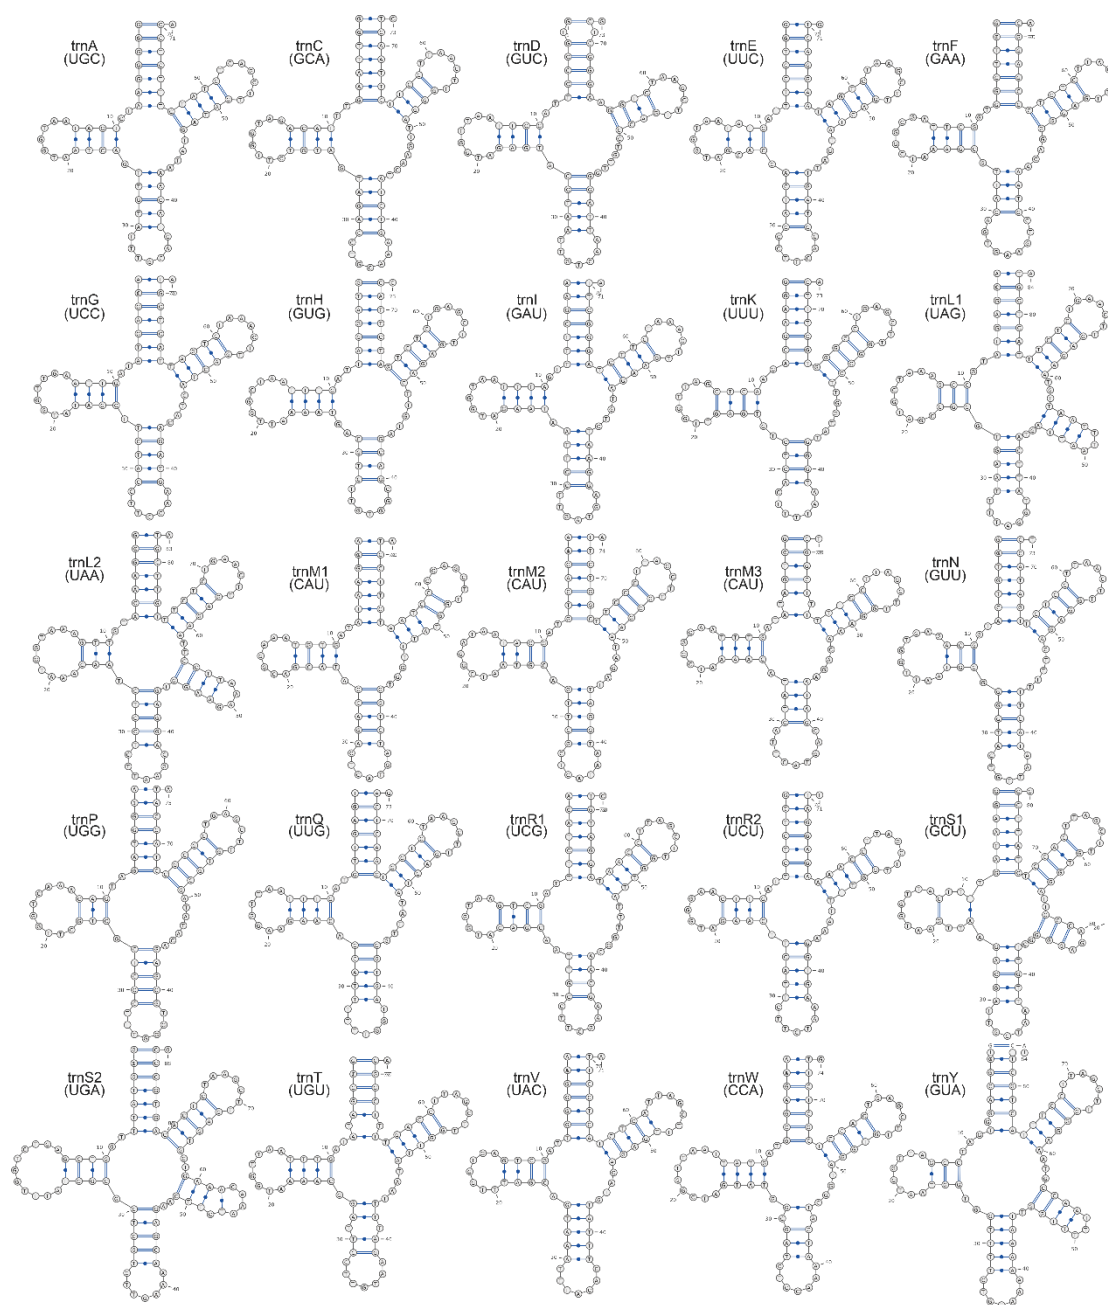

**Figure S3. Predicted secondary cloverleaf structures for tRNAs of *Phellinus ferrugineofuscus*.**

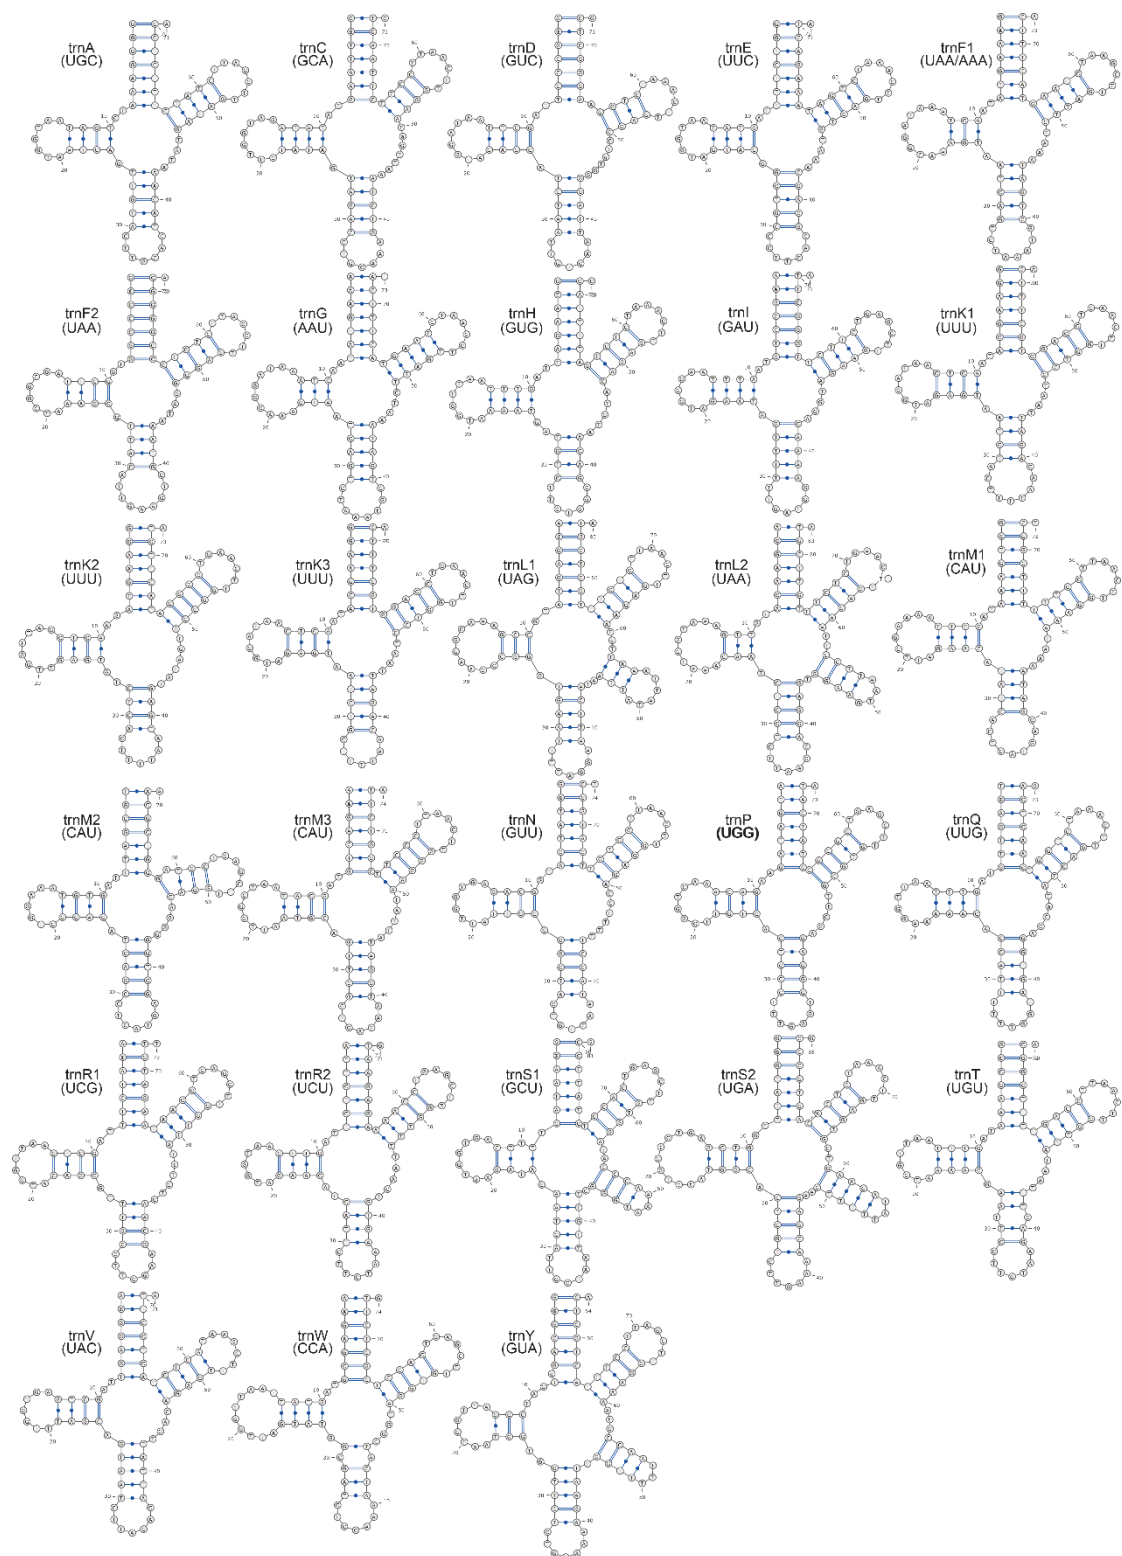

**Figure S4. Predicted secondary cloverleaf structures for tRNAs of *Phellinus gilvus*.**

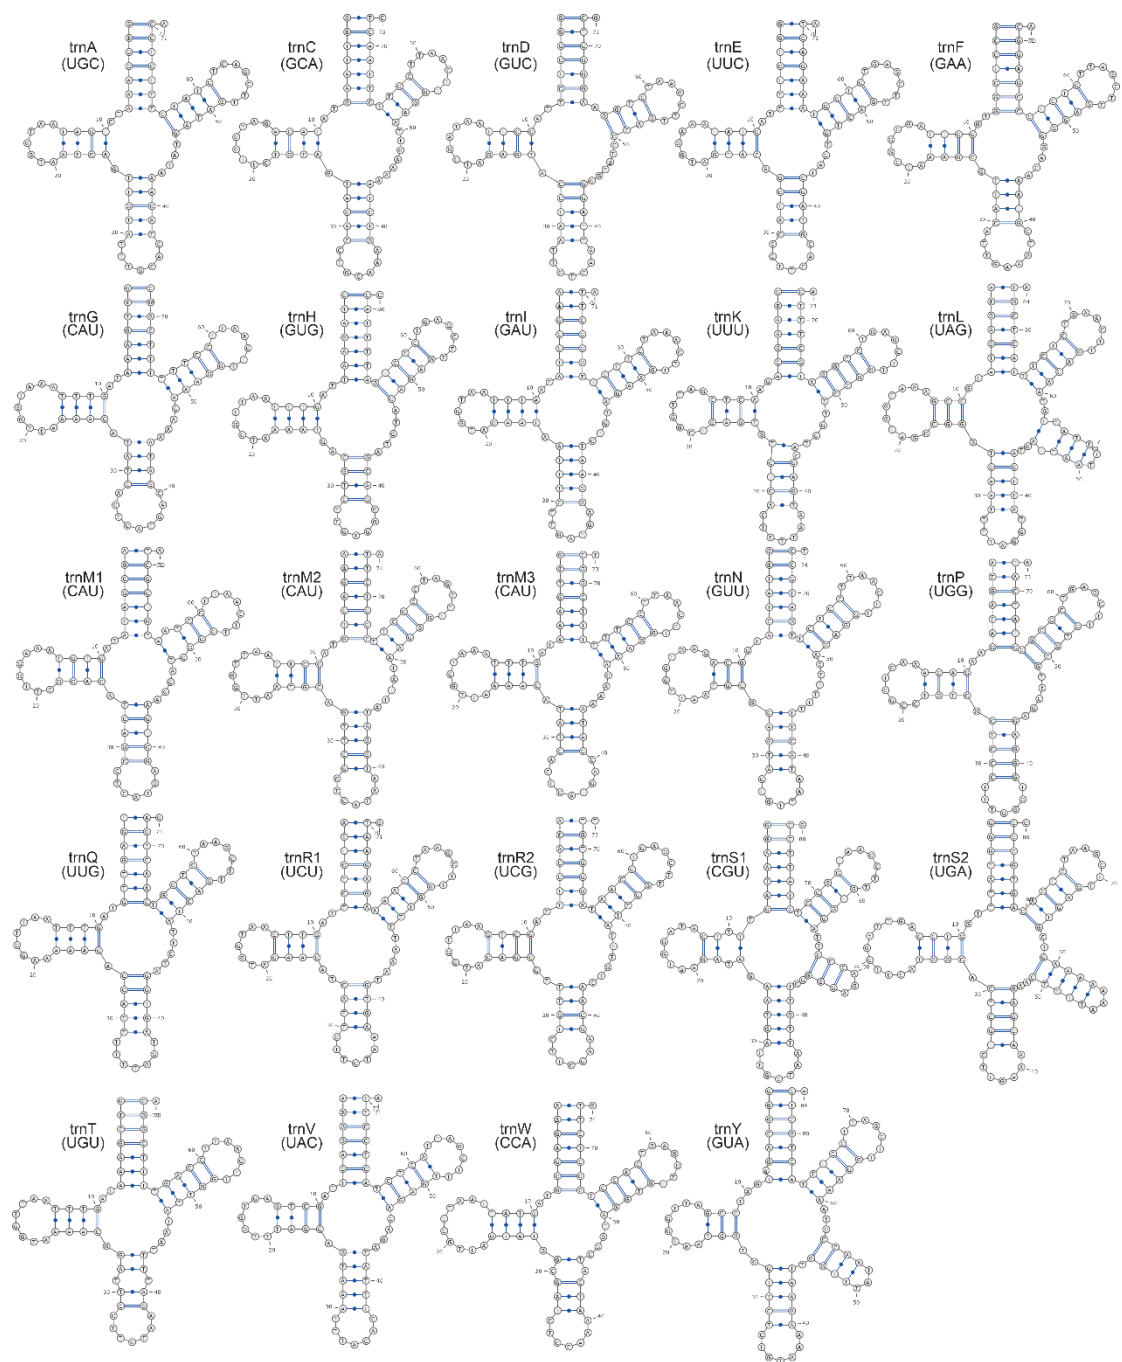

**Figure S5.** Predicted secondary cloverleaf structures for tRNAs of *Porodaedalea niemelaei*.



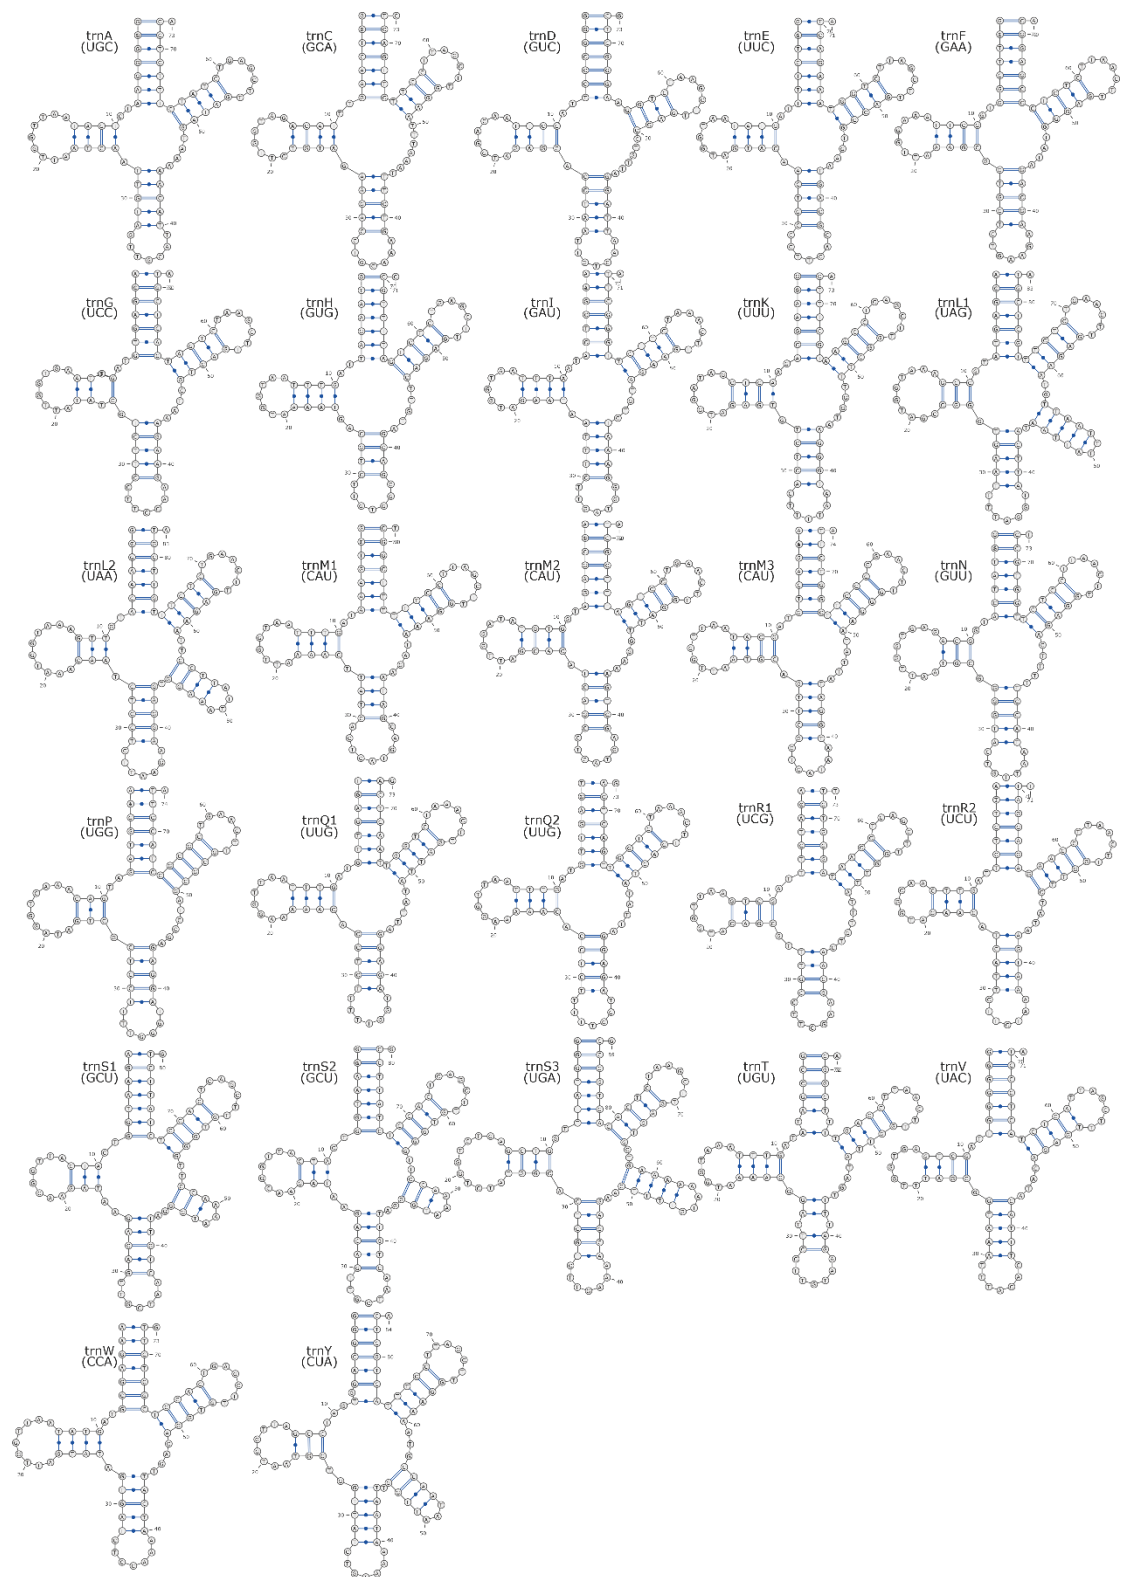

**Figure S6.** Predicted secondary cloverleaf structures for tRNAs of *Phellinus viticola*.



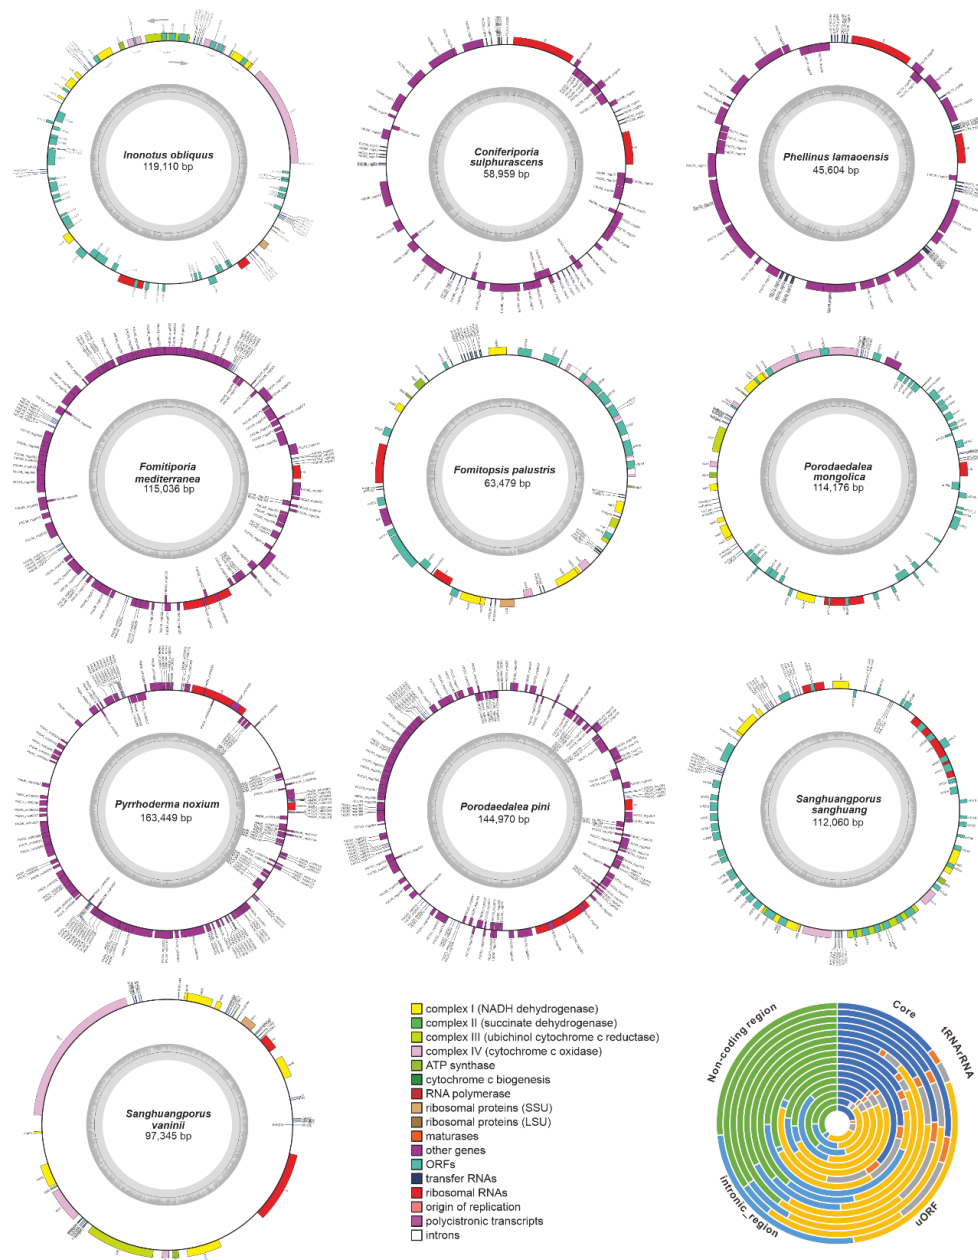

**Figure S7. Mitochondrial relative composition of all Sanghuang-related fungi and circular maps of the other 10 Sanghuang-related fungi.**

These Sanghuang-related fungi includes *Inonotus obliquus*, *Coniferiporia sulphurascens*, *Phellinus lamaoensis*, *Fomitiporis mediterranea*, *Fomitopsis palustris*, *Porodaedalea mongolica*, *Pyrrhoderma noxium*, *Porodaedalea pini*, *Sanghuangporus sanghuang* and *Sanghuangporus vaninii*.

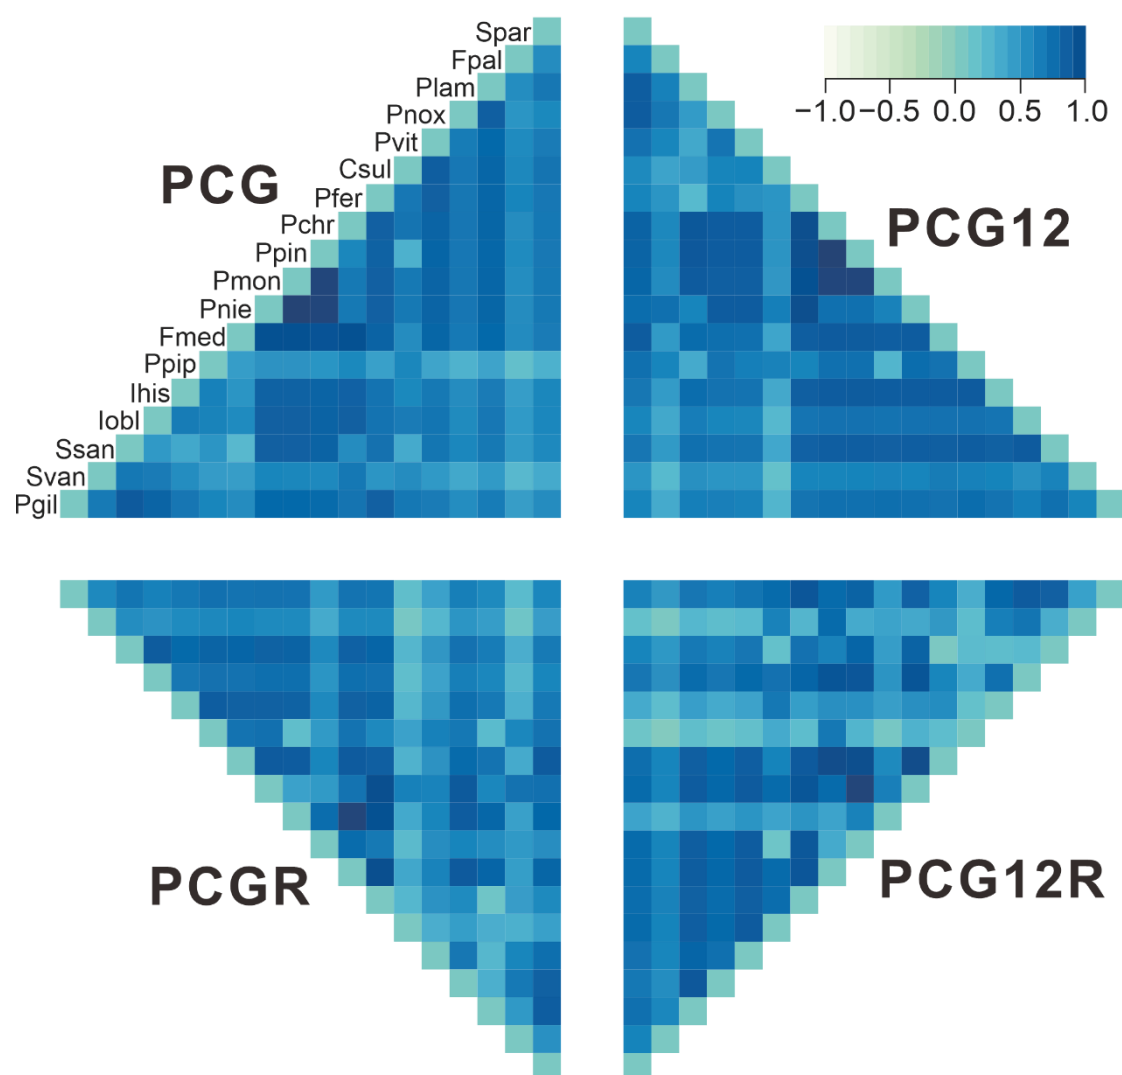

**Figure S8. Heterogeneous sequence differentiation of mitochondrial genome based on the four data sets.**

The average similarity score between the sequences is represented by a colored block, based on an AliGROOVE(Kück et al. 2014) score from -1 to +1.

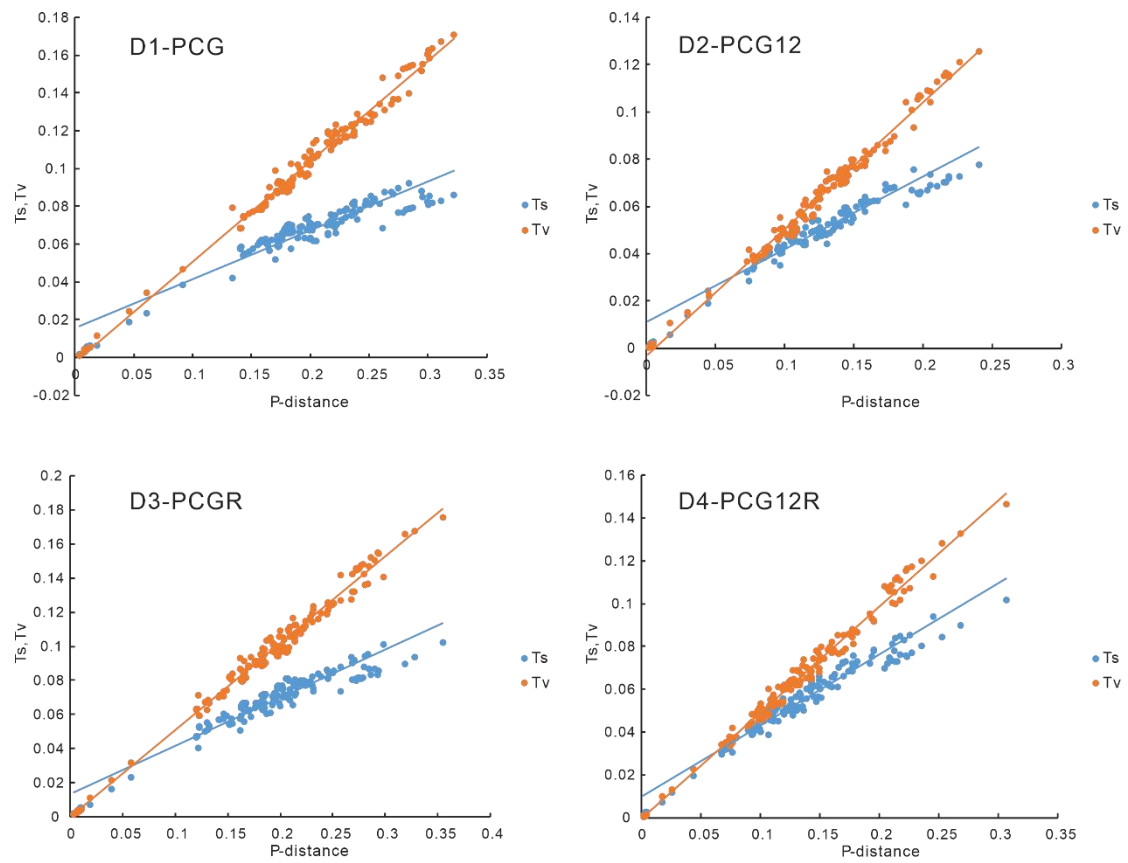

**Figure S9.** Base substitution saturation analysis based on the four datasets, conducted by DAMBE(Xia and Xie 2001).

## Reference

- Chan PP, Lowe TM (2019) tRNAscan-SE: Searching for tRNA Genes in Genomic Sequences. In: Kollmar M (ed) Gene Prediction: Methods and Protocols. Springer New York, New York, NY, pp 1-14
- Kück P, Meid SA, Groß C, Wägele JW, Misof B (2014) AliGROOVE – visualization of heterogeneous sequence divergence within multiple sequence alignments and detection of inflated branch support. BMC Bioinformatics 15(1):294 doi:10.1186/1471-2105-15-294
- Xia X, Xie Z (2001) DAMBE: Software Package for Data Analysis in Molecular Biology and Evolution. Journal of Heredity 92(4):371-373 doi:10.1093/jhered/92.4.371
